# Supplementary material for: Ru single atoms for efficient chemoselective hydrogenation of nitrobenzene to azoxybenzene
Source: Royal Society of Chemistry journal article supplement (doi:10.1039/d1gc01439k), 2021-01-01
Supplement: d1gc01439k1.pdf [file d1gc01439k1.pdf]

## **Ru Single Atoms for Efficient Chemoselective Hydrogenation of Nitrobenzene to Azoxybenzene**

Bo Wu, Tiejun Lin, Ruouo Yang, Min Huang, Huan Zhang, Ji Li, Fanfei Sun, Fei Song,  
Zheng Jiang, Liangshu Zhong,\* Yuhan Sun\*

**The supporting information including**

**Scheme S1-S2**

**Table S1**

**Figure S1-S7**

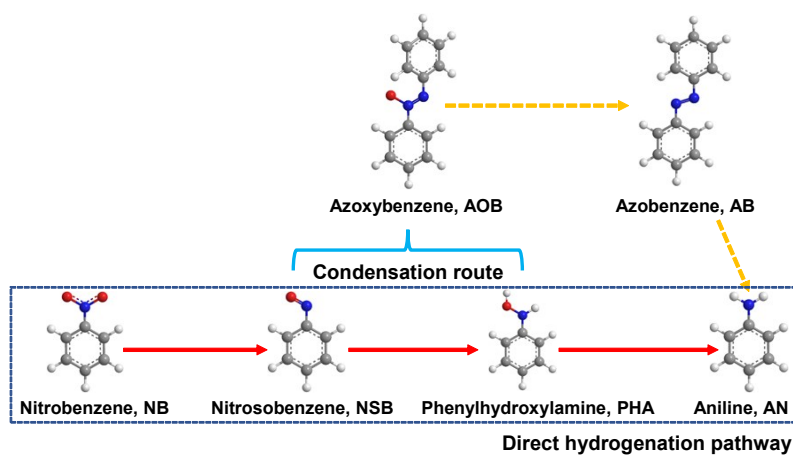

**Scheme S1.** Schematic illustrations of reaction pathway for nitrobenzene hydrogenation reaction, with C in gray, O in red, N in blue and H in white.

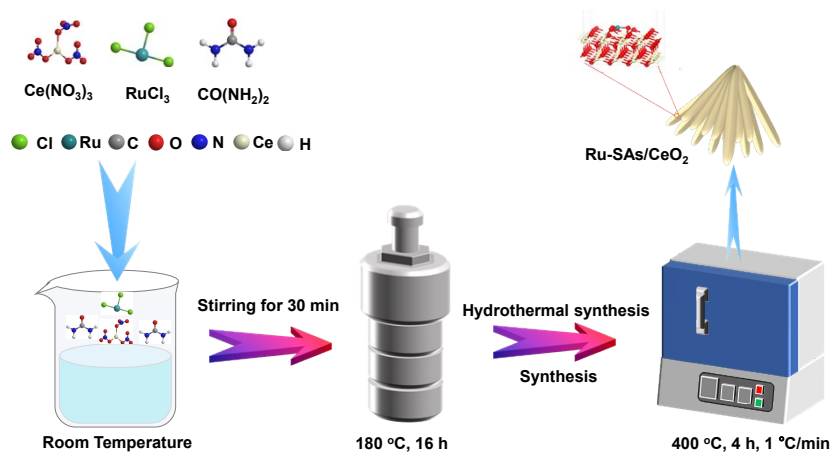

**Scheme S2.** Schematic illustrations of the preparation of Ru-SAs/CeO<sub>2</sub> catalyst, with C in gray, O in red, N in blue, H in white, Ru in teal, Ce in yellow, Cl in green.

**Table S1.** Element analysis and texture properties of various samples.

| Entry | Catalysts               | Ru loading<br>[wt%] | $S_{\text{BET}}^{\text{b}}$<br>[m <sup>2</sup> /g] | $V_{\text{p}}^{\text{b}}$<br>[cm <sup>3</sup> /g] | Pore size <sup>b</sup><br>[nm] |
|-------|-------------------------|---------------------|----------------------------------------------------|---------------------------------------------------|--------------------------------|
| 1     | CeO <sub>2</sub>        | 0                   | 53.9                                               | 0.08                                              | 6.2                            |
| 2     | Ru-SAs/CeO <sub>2</sub> | 1.6                 | 88.2                                               | 0.09                                              | 3.9                            |
| 3     | Ru-NPs/CeO <sub>2</sub> | 1.7                 | 51.8                                               | 0.06                                              | 4.3                            |

<sup>a</sup>The concentration of Ru was measured by ICP-OES.

<sup>b</sup>Determined by N<sub>2</sub> adsorption/desorption isotherms.

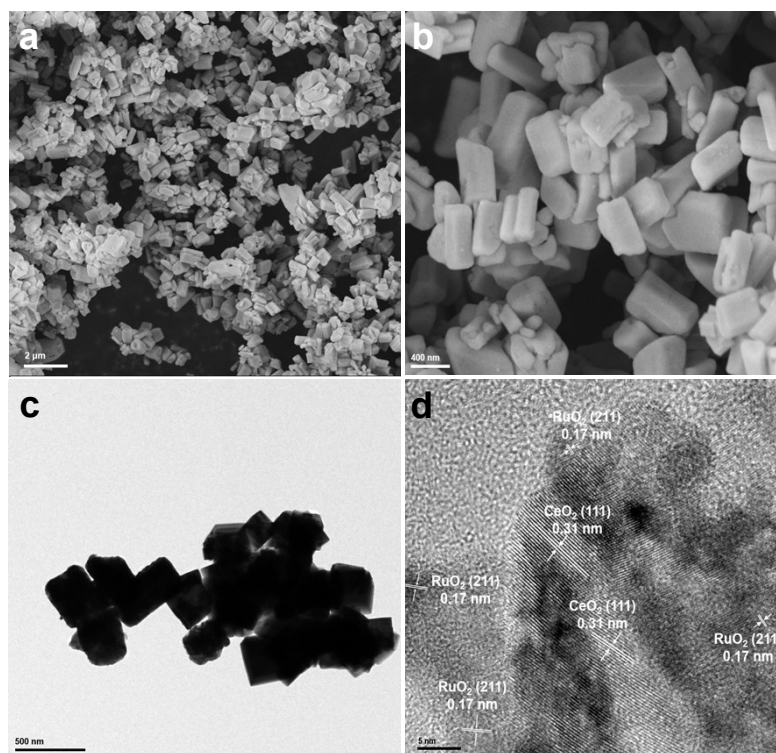

**Figure S1.** (a, b) SEM images. (c) TEM image, (d) Representative HRTEM image of the Ru-NPs/CeO<sub>2</sub>.

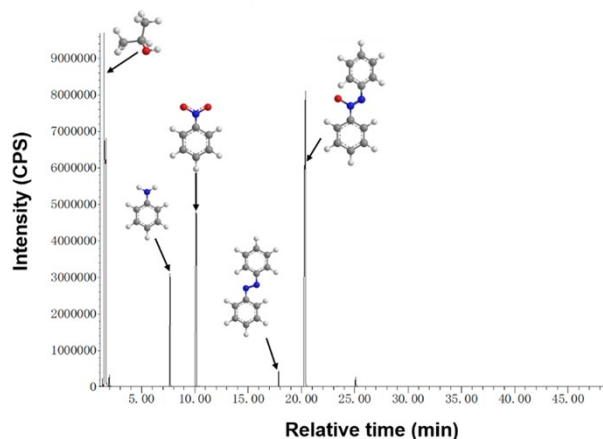

**Figure S2.** GC-MS spectrum of Ru-SAs/CeO<sub>2</sub> for the selective hydrogenation of nitrobenzene. Azoxybenzene was the main product, partial of aniline and trace azobenzene were also detected.

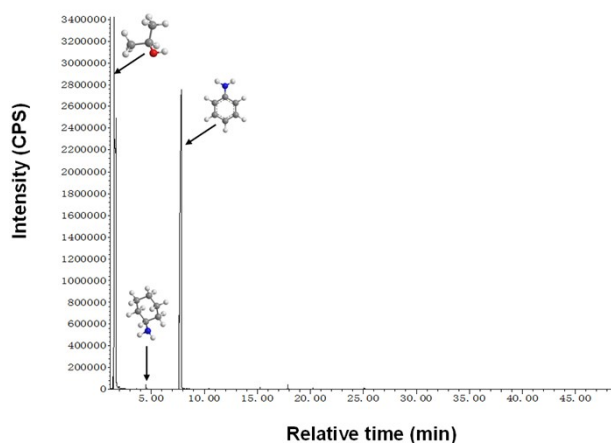

**Figure S3.** GC-MS spectrum of Ru-NPs/CeO<sub>2</sub> for the selective hydrogenation of nitrobenzene. Aniline was the main product, and trace cyclohexylamine was also detected.

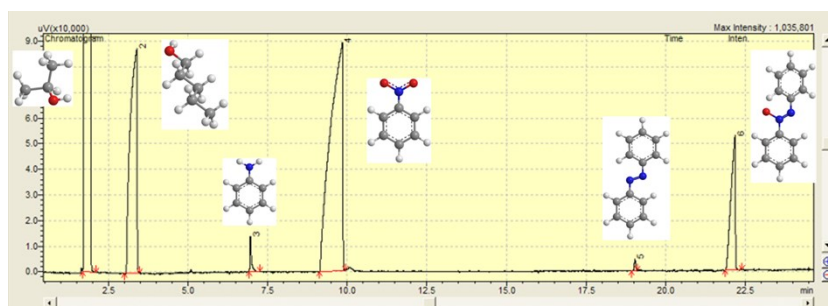

**Figure S4.** GC spectrum of Ru-SAs/CeO<sub>2</sub> for the selective hydrogenation of nitrobenzene. Azoxybenzene was the main product, and small proportion of aniline and azobenzene were also detected.

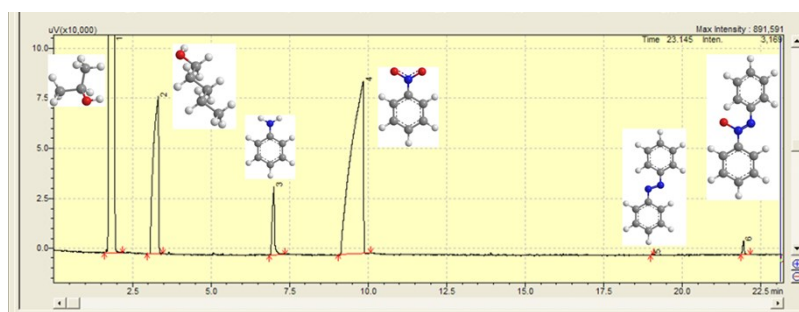

**Figure S5.** GC spectrum of Ru-NPs/CeO<sub>2</sub> for the selective hydrogenation of nitrobenzene. Aniline was the main product, small part of azobenzene and azoxybenzene were also detected.

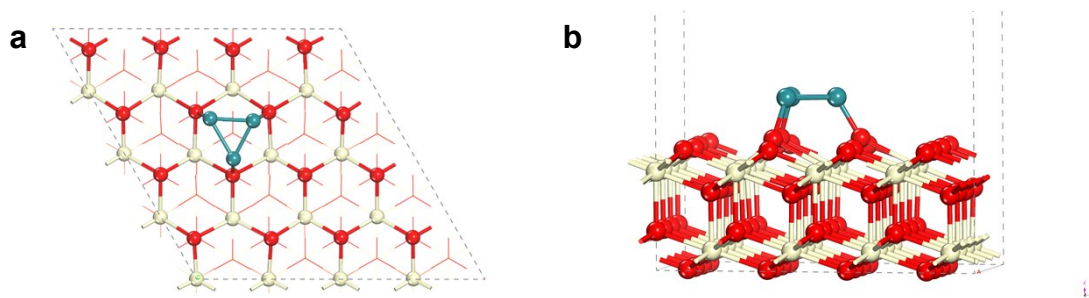

**Figure S6. Coordinated structure of Ru<sub>3</sub> on the Ru-SCs/CeO<sub>2</sub> (111) surface.** Top (a) and side (b) view of the detailed structure of Ru-SCs/CeO<sub>2</sub>.

For the Ru-SCs/CeO<sub>2</sub> (111) structure, each Ru atom from the Ru<sub>3</sub> cluster was bonded with a surface lattice oxygen, with the Ru-O length was calculated to be 1.86 ~ 1.90 Å, with O in red, Ce in yellow and Ru in teal.



**a**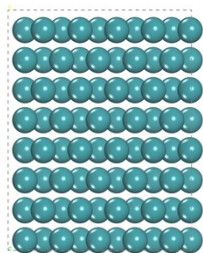**b**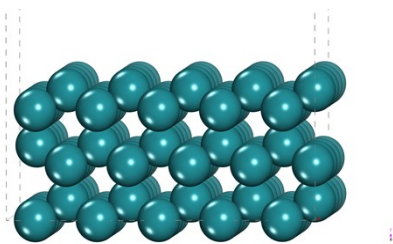

**Figure S7.** Top (a) and side (b) view of the detailed structure of metallic Ru (100) structure, with Ru in teal.
